# Supplementary material for: Characterization of the fecal microbiota differs between age groups in Koreans
Source: PubMed Central journal article supplement — Intest Res. 2018 Apr 30;16(2):246–54. doi: 10.5217/ir.2018.16.2.246 (PMC5934597; doi:10.5217/ir.2018.16.2.246), 2018-04-30
Supplement: ir-16-246-s001.pdf [file ir-16-246-s001.pdf]

See “Characterization of the fecal microbiota differs between age groups in Koreans” on page 246.

**Supplementary Table 1.** Culture Conditions for Standard Bacterial Strains

| Standard bacterial strains                             | Culture media | Culture conditions | Cultivation temperature (°C) |
|--------------------------------------------------------|---------------|--------------------|------------------------------|
| <i>Lactobacillus casei</i> ATCC 383                    | MRS medium    | Anaerobic          | 37                           |
| <i>Bifidobacterium animalis subs. lactis</i> JCM 10602 | BL medium     | Anaerobic          | 37                           |
| <i>Bacteroides fragilis</i> ATCC 25285                 | RCM           | Anaerobic          | 37                           |
| <i>Clostridium sphenoides</i> ATCC 19403               | RCM           | Anaerobic          | 37                           |

Remarks: for anaerobic cultivation, bacteria were grown at standard anaerobic chamber of 85% N<sub>2</sub>, 10% CO<sub>2</sub>, and 5% H<sub>2</sub>.

ATCC, American Type Culture Collection; MRS, Man Rogosa and Sharpe; JCM, Japan Collection of Microorganism; BL, Blood-Liver; RCM, Reinforced Clostridial Medium.
